# Supplementary material
Source: MDPI journal article supplement (https://www.mdpi.com/1999-5903/13/7/184)
Supplement: s1 [file s1]

Archive with 1 entries (1 files):
- futureinternet-1265663-supplementary.pdf
